# Supplementary material for: Association of microRNAs genes polymorphisms with arthritis: a systematic review and meta-analysis
Source: Oxford University Press journal article supplement (doi:10.1042/bsr20190298), 2019-06-24
Supplement: bsr-2019-0298_supp.pdf [file bsr-2019-0298_supp.pdf]

## Supplementary Content

eTable 1. Case-control Studies Included In Systematic Reviews and Meta-Analyses. Evaluating association of microRNAs genes polymorphisms with arthritis.

eTable 2. Summary of the P value for heterogeneity test in this meta-analysis.

eFigure 1. Begg's funnel plot of publication bias test for the association between miR-146a rs2910164 (G/C) polymorphism and RA risk under allelic model (G versus C).

eFigure 2. Begg's funnel plot of publication bias test for the association between miR-499 rs3746444 (T/C) polymorphism and RA risk under allelic model (T versus C).

eFigure 3. Sensitivity analysis of association of miR-146a rs2910164 (G/C) polymorphism and RA risk under allelic model (G versus C).

eFigure 4. Sensitivity analysis of association of miR-499 rs3746444 (T/C) polymorphism and RA risk under allelic model (T versus C).

eTable 1 Case-control Studies Included In Systematic Reviews and Meta-Analyses. Evaluating association of microRNAs genes polymorphisms with arthritis.

| Gene<br>Polymorphisms | Disease | Studies                                | Systematic reviews and meta-analyses |         |         |              |             |            |              |              |            |           |
|-----------------------|---------|----------------------------------------|--------------------------------------|---------|---------|--------------|-------------|------------|--------------|--------------|------------|-----------|
|                       |         |                                        | Chen<br>2013                         | Li 2014 | Lu 2014 | Yang<br>2014 | Lee<br>2015 | Li<br>2015 | Song<br>2015 | Zhou<br>2015 | Fu<br>2016 | Yang 2017 |
| miR 146a<br>rs2910164 | RA      | Chatzikyriakidou<br>2010a <sup>1</sup> | Y                                    | Y       |         | Y            | Y           |            |              | Y            | Y          | Y         |
|                       |         | Yang 2011 <sup>2</sup>                 | Y                                    | Y       |         | Y            | Y           |            |              | Y            | Y          | Y         |
|                       |         | Jimenez-Morales<br>2012 <sup>3</sup>   | Y                                    | Y       |         | Y            |             |            |              | Y            | Y          |           |
|                       |         | Hashemi 2012 <sup>5</sup>              |                                      | Y       |         | Y            |             |            | Y            | Y            | Y          |           |
|                       |         | Qian 2012 <sup>4</sup>                 | Y                                    | Y       |         | Y            |             |            | Y            | Y            | Y          |           |
|                       |         | El-Shal 2013 <sup>6</sup>              |                                      | Y       |         |              |             |            | Y            | Y            | Y          |           |
|                       |         | Zhou 2015 <sup>7</sup>                 |                                      |         |         |              |             |            |              | Y            |            |           |
| miR 499<br>rs3746444  | RA      | Chatzikyriakidou<br>2010a              |                                      |         |         |              |             |            |              |              |            |           |
|                       |         | Yang 2011                              |                                      | Y       | Y       | Y            |             |            | Y            |              | Y          | Y         |
|                       |         | Jimenez-Morales<br>2012                |                                      |         |         |              |             |            |              |              |            |           |
|                       |         | Hashemi 2012                           |                                      | Y       | Y       | Y            |             |            | Y            |              | Y          |           |
|                       |         | Qian 2012                              |                                      |         |         |              |             |            |              |              |            |           |
|                       |         | El-Shal 2013                           |                                      | Y       | Y       |              |             |            | Y            |              | Y          | Y         |
|                       |         | Zhang 2013                             |                                      |         | Y       | Y            |             |            |              |              |            | Y         |
| miR 146a              | PsA     | Chatzikyriakidou                       | Y                                    |         |         |              |             |            | Y            |              |            |           |

---

|           |     |                 |  |   |
|-----------|-----|-----------------|--|---|
| rs2910164 |     | 2010b           |  |   |
| miR 146a  | JRA | Jimenez-Morales |  | Y |
| rs2910164 |     | 2012            |  |   |
| miR 146a  | JIA | Singh 2014      |  | Y |
| rs2910164 |     | Jimenez-Morales |  | Y |
|           |     | 2012            |  |   |

---

Abbreviation: Y, yes (Each “Y” indicates that this study was included in the systematic reviews and meta-analyses of corresponding column).  
References



---

(T/C)

|                       |   |      |      |        |       |       |       |        |       |       |       |        |       |
|-----------------------|---|------|------|--------|-------|-------|-------|--------|-------|-------|-------|--------|-------|
| RA                    |   |      |      | 50.7%% | 0.059 | 0.00% | 0.537 | 51.50% | 0.054 | 0.00% | 0.658 | 56.50% | 0.032 |
| Female                | 2 | 425  | 485  | 73.80% | 0.051 | 0.00% | 0.756 | 84.20% | 0.012 | 0.00% | 0.964 | 82.90% | 0.016 |
| <i>Ethnicity</i>      |   |      |      |        |       |       |       |        |       |       |       |        |       |
| Caucasian             | 4 | 781  | 887  | 0.00%  | 0.514 | 0.00% | 0.891 | 29.5%% | 0.235 | 0.00% | 0.735 | 25.30% | 0.260 |
| Asian                 | 3 | 800  | 1282 | 4.40%  | 0.351 | 0.00% | 0.598 | 18.50% | 0.293 | 0.00% | 0.592 | 14.20% | 0.312 |
| <i>Control source</i> |   |      |      |        |       |       |       |        |       |       |       |        |       |
| PB                    | 6 | 1375 | 1703 | 25.1%% | 0.246 | 0.00% | 0.752 | 42.40% | 0.123 | 0.00% | 0.778 | 44.00% | 0.112 |
| HB                    | 1 | 206  | 466  | /      | /     | /     | /     | /      | /     | /     | /     | /      | /     |
| <i>Quality score</i>  |   |      |      |        |       |       |       |        |       |       |       |        |       |
| ≤7 points             | 1 | 412  | 486  | /      | /     | /     | /     | /      | /     | /     | /     | /      | /     |
| >7 points             | 6 | 1169 | 1683 | 58.8%% | 0.033 | 0.00% | 0.462 | 59.00% | 0.032 | 0.00% | 0.613 | 63.40% | 0.018 |
| AS                    | 1 | 102  | 105  | /      | /     | /     | /     | /      | /     | /     | /     | /      | /     |

---

**Abbreviation:** PHet: the P value for heterogeneity test
